# Supplementary material for: STAU2 protein level is controlled by caspases and the CHK1 pathway and regulates cell cycle progression in the non-transformed hTERT-RPE1 cells
Source: Springer Nature journal article supplement (doi:10.1186/s12860-021-00352-y), 2021-03-04

**FIGURE 1A**

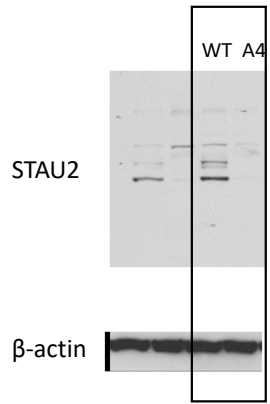

**FIGURE 1D**

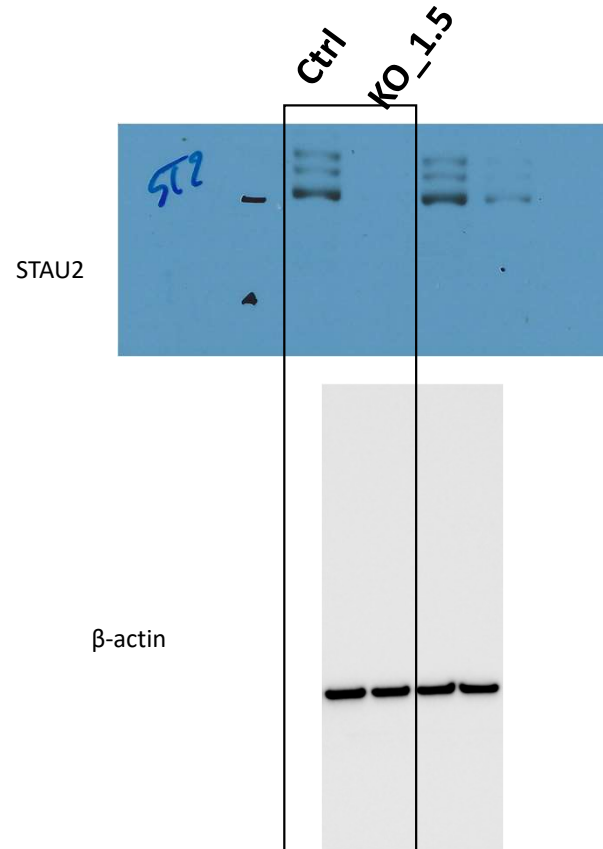

**FIGURE 2A**

**hTERT-RPE1**

**HCT116**

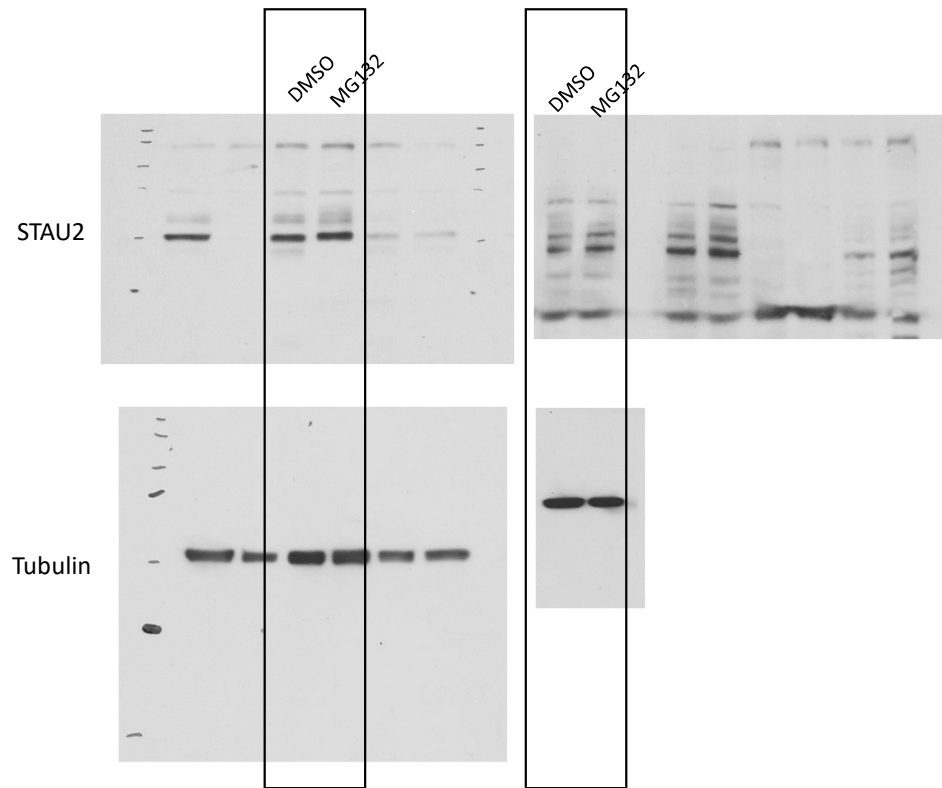

**FIGURE 2B**

**hTERT-RPE1**

**HCT116**

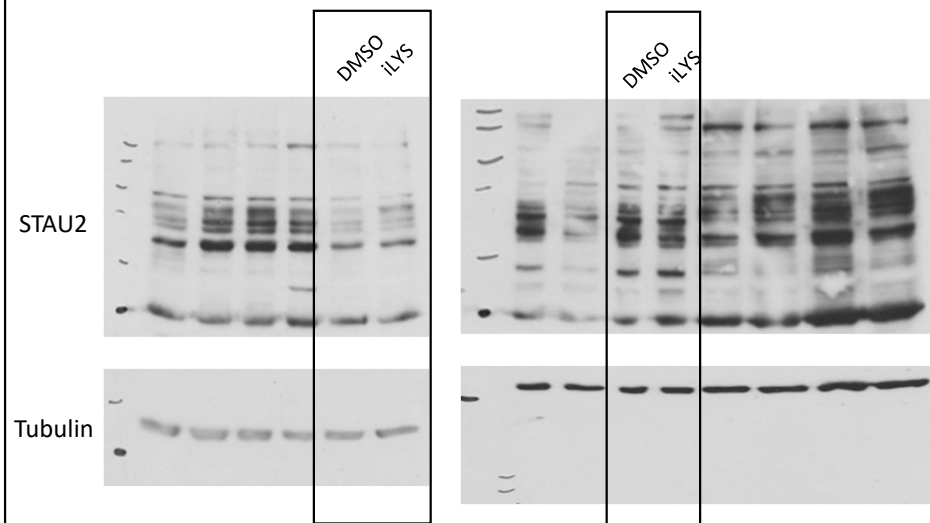

**FIGURE 2C**

**hTERT-RPE1**

ZVAD  
0 8 12 24 h

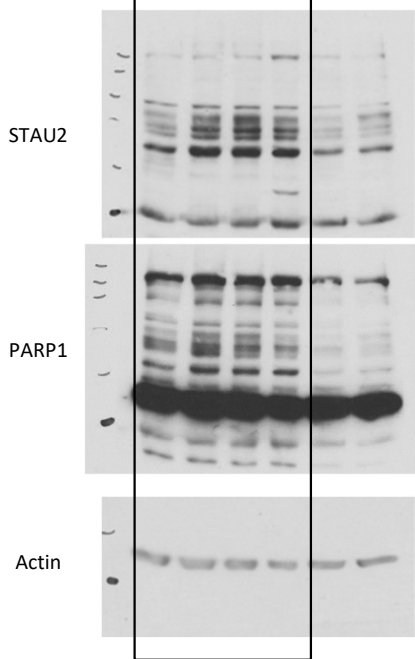

**hTERT-RPE1**

DMSO  
Emit

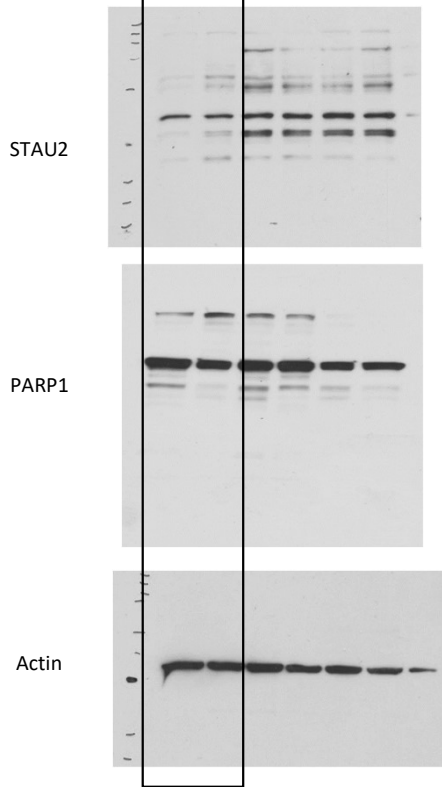

**HCT116**

0 8 12 24 h ZVAD

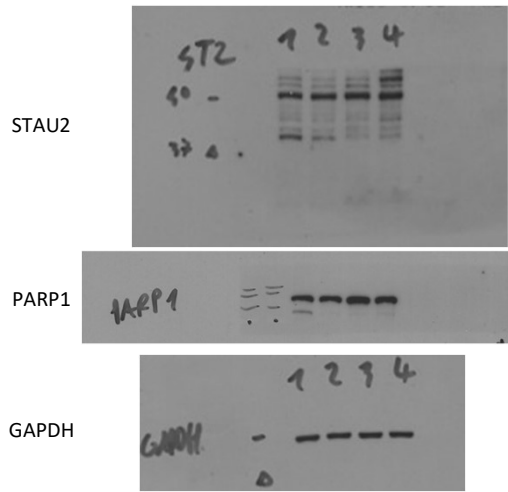

**HCT116**

DMSO  
Emit

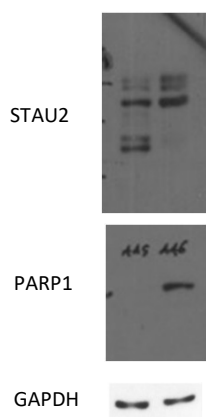

**FIGURE 2D**

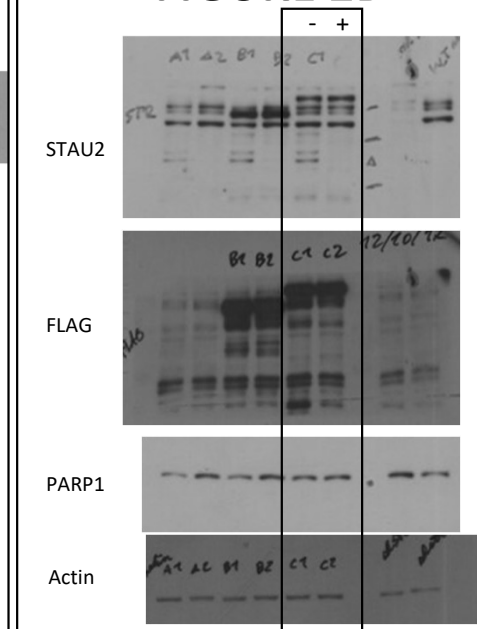

**FIGURE 3B**

HRP-Streptavidin

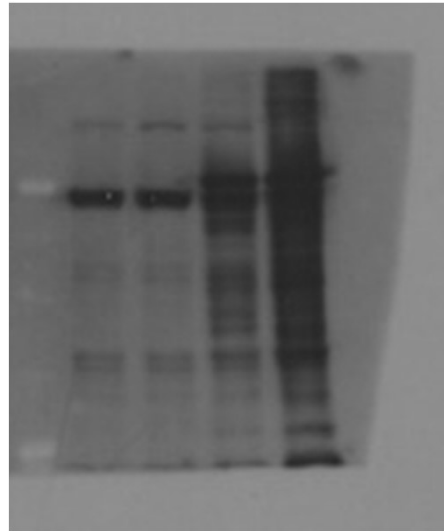

Actin

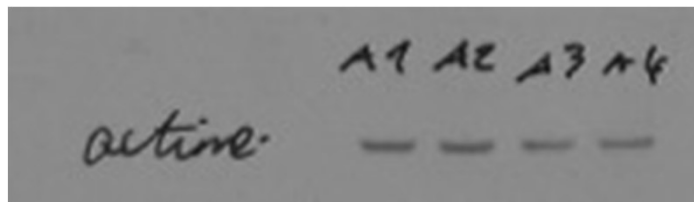

**FIGURE 4A**

**hTERT-RPE1**

**HCT116**

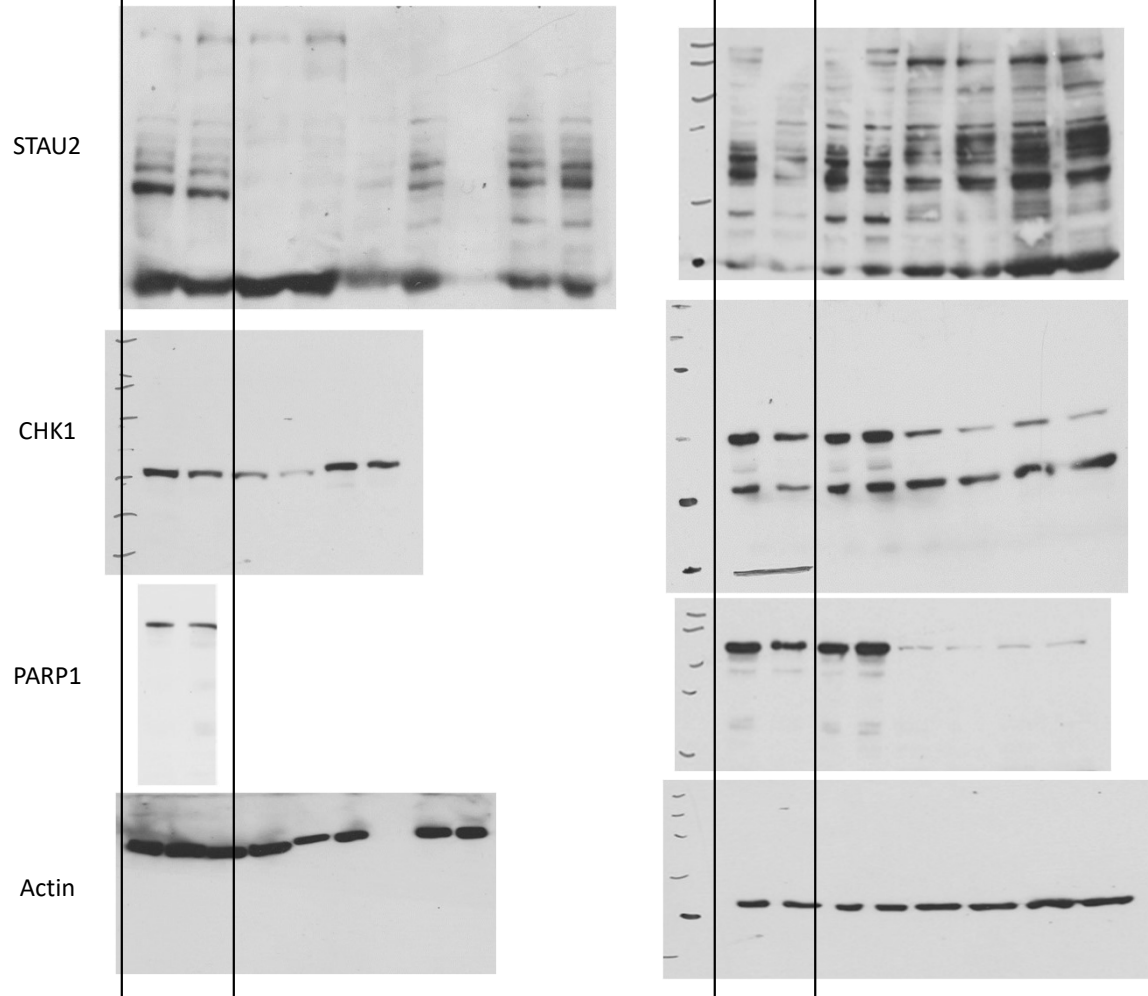

**FIGURE 4C**

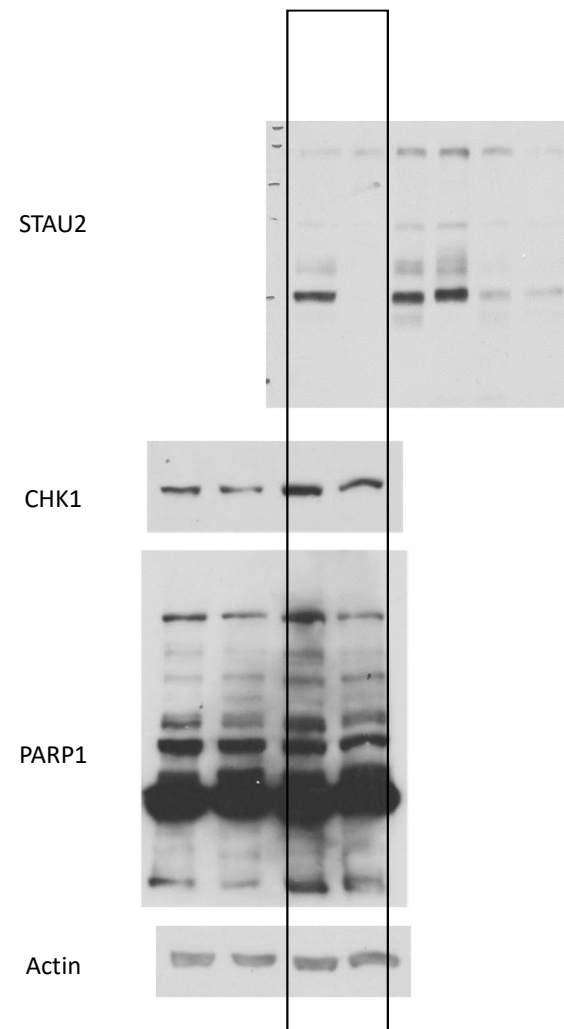

**FIGURE S1 B**

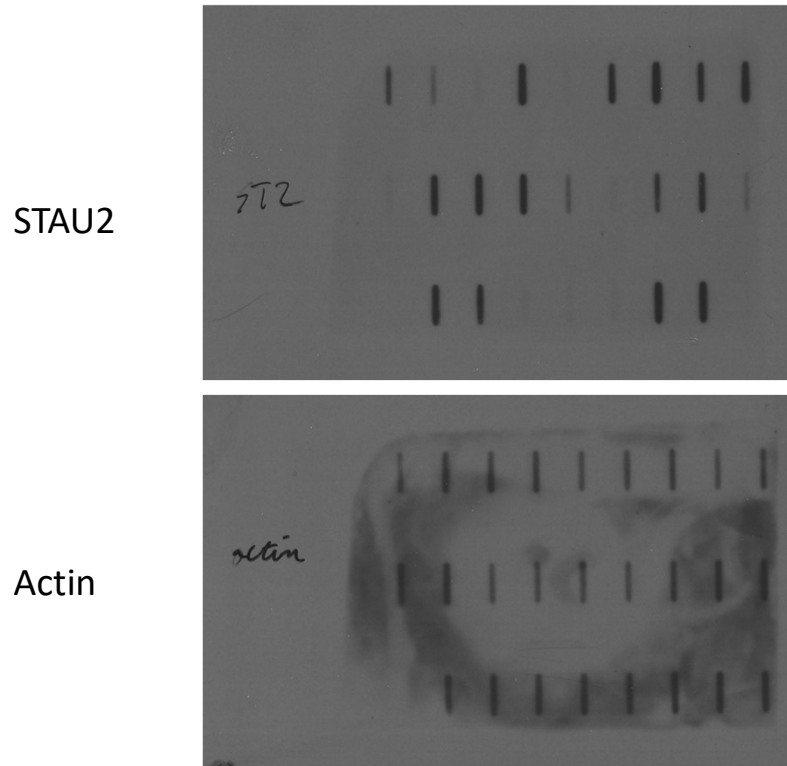

**FIGURE S3 B:**

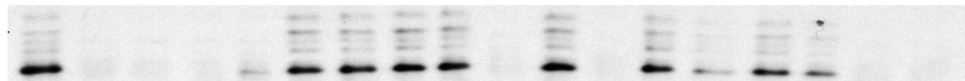

**FIGURE S4A**

**HCT116**

**HCT116**

D i PF

D CH

1 2 3 4 5 6

1 2 3 4 5 6

STAU2

PARP1

Actin

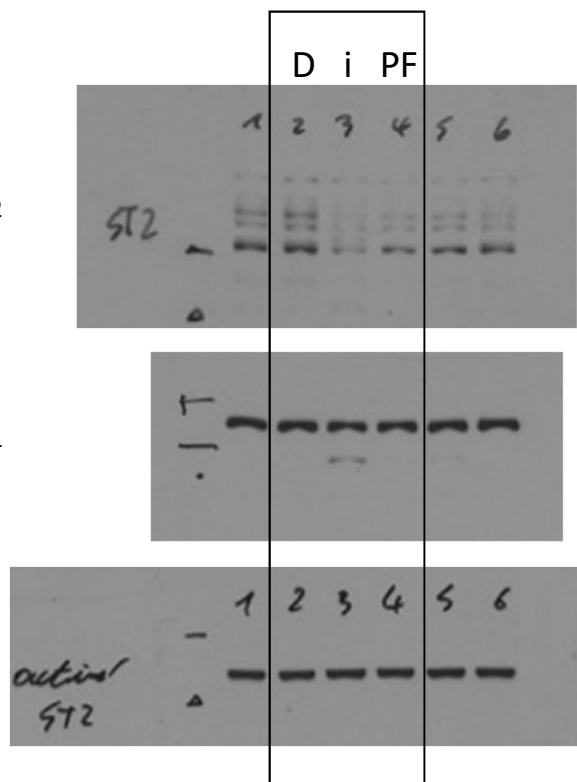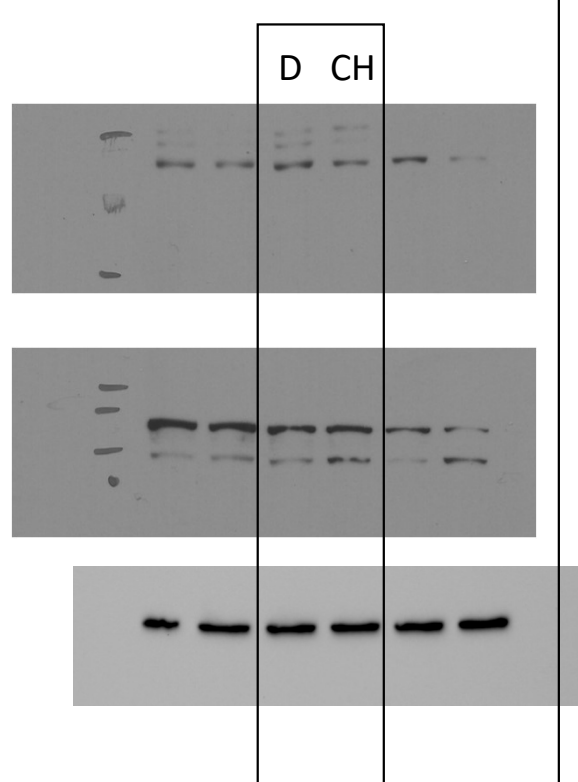

**FIGURE S4B**

**hTERT-RPE1**

**HCT116**

STAU2

PARP1

CHK1

Actin

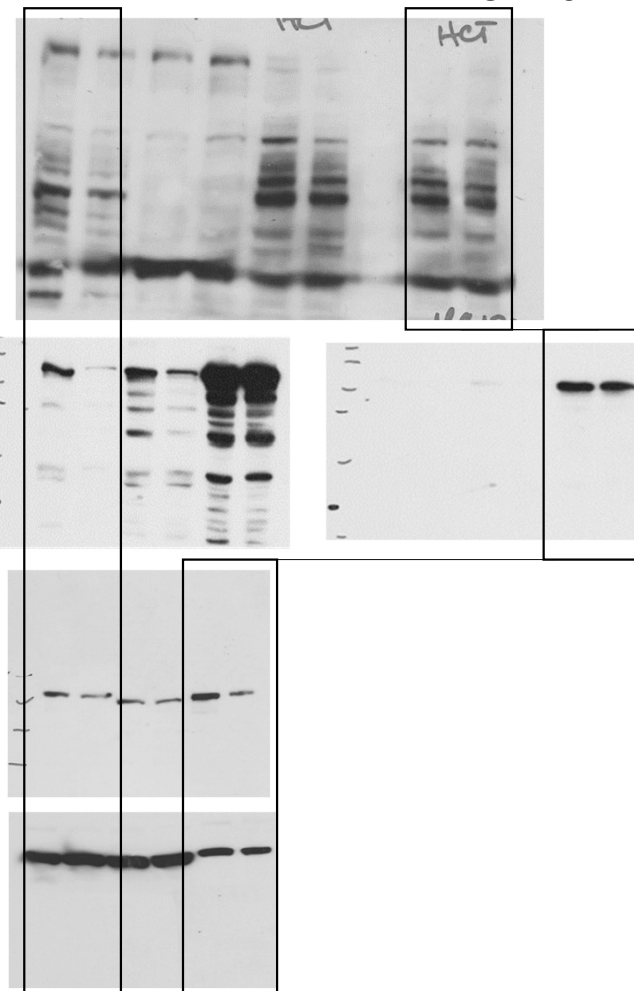

**FIGURE S6 A**

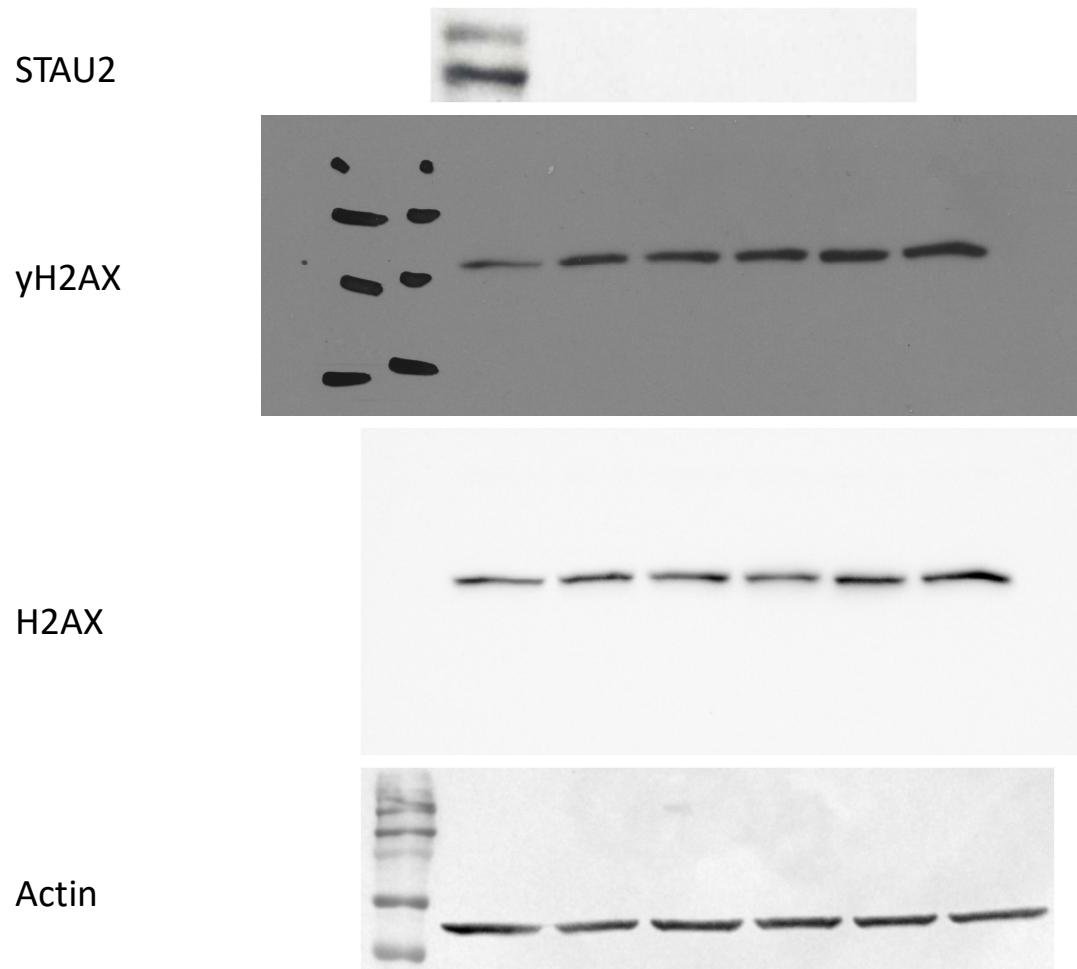

Supplement: 12860_2021_352_MOESM7_ESM.pdf [file 12860_2021_352_MOESM7_ESM.pdf]
