# Supplementary material for: STAU2 protein level is controlled by caspases and the CHK1 pathway and regulates cell cycle progression in the non-transformed hTERT-RPE1 cells
Source: Springer Nature journal article supplement (doi:10.1186/s12860-021-00352-y), 2021-03-04

**A** hTERT-RPE1

WT A4 B5

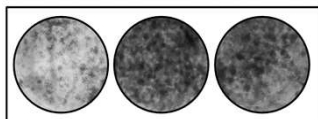

**B** hTERT-RPE1

shNT shSTAU2

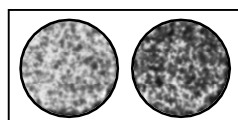

**C** HeLa

shNT shSTAU2

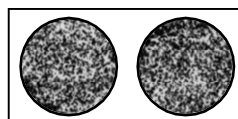

**D** HCT116

Ctrl STAU2-KO

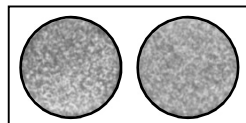

Supplement: 12860_2021_352_MOESM2_ESM.pdf [file 12860_2021_352_MOESM2_ESM.pdf]
