# Supplementary material for: STAU2 protein level is controlled by caspases and the CHK1 pathway and regulates cell cycle progression in the non-transformed hTERT-RPE1 cells
Source: Springer Nature journal article supplement (doi:10.1186/s12860-021-00352-y), 2021-03-04

Supplementary Figure S5

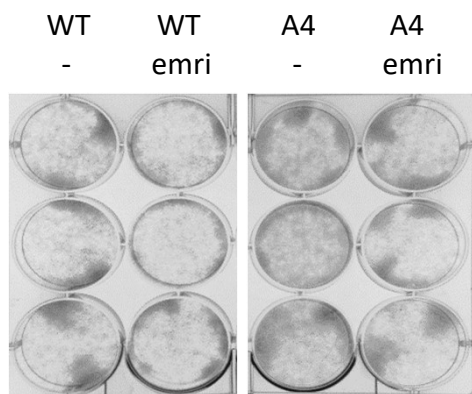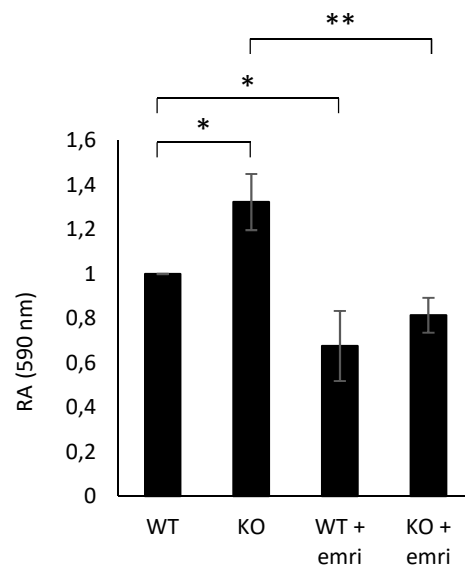

Supplement: 12860_2021_352_MOESM5_ESM.pdf [file 12860_2021_352_MOESM5_ESM.pdf]
