# Supplementary material for: STAU2 protein level is controlled by caspases and the CHK1 pathway and regulates cell cycle progression in the non-transformed hTERT-RPE1 cells
Source: Springer Nature journal article supplement (doi:10.1186/s12860-021-00352-y), 2021-03-04
Supplement: 12860_2021_352_MOESM11_ESM.pdf [file 12860_2021_352_MOESM11_ESM.pdf]

## Supplementary Table S4

### Proteins involved in the DNA repair and/or replication pathways

| PREY     | Damage Repair |             | Cellular Response |                   | CHK1 PATHWAY |
|----------|---------------|-------------|-------------------|-------------------|--------------|
| APEX1    |               | BER         |                   |                   | X            |
| AURKB    |               |             | Cell cycle        |                   | X            |
| AQR      |               | NER         |                   |                   |              |
| CAD      |               |             |                   | Others            |              |
| CCAR2    |               |             |                   | Others            |              |
| CDK1     |               |             | Replication       | Cell cycle        | X            |
| CDK16    |               |             |                   | Cell cycle        |              |
| CNOT1    |               |             |                   | Cell cycle Others |              |
| CUL4A    |               | NER         |                   | Cell cycle Others | X            |
| CUL4B    |               | NER         |                   | Cell cycle Others | X            |
| DDX1     | DSB           |             |                   |                   |              |
| DNAJA1   |               |             |                   | Others            |              |
| FEN1     | DSB HR        |             | Replication       |                   | X            |
| FMR1     |               |             |                   | Others            |              |
| HUWE1    |               | BER         |                   |                   |              |
| IFI16    |               |             |                   | Others            |              |
| MCM2     | DSB HR        |             | Replication       |                   |              |
| MCM3     | DSB HR        |             | Replication       |                   |              |
| MCM4     | DSB HR        |             | Replication       |                   |              |
| MCM5     | DSB HR        |             | Replication       |                   |              |
| MCM6     | DSB HR        |             | Replication       |                   | X            |
| MCM7     | DSB HR        |             | Replication       |                   | X            |
| MMS19    |               | NER         |                   |                   |              |
| MSH2     | DSB           |             | MMR               |                   | X            |
| MSH6     | DSB           |             | MMR               |                   | X            |
| OTUB1    |               |             |                   | Others            |              |
| PARP1    | DSB HR        | NER         |                   |                   |              |
| POLD1    |               | NER BER     | Replication       |                   |              |
| PRKDC    | DSB           | NHEJ        |                   | Others            | X            |
| RECQL    | DSB HR        |             | Replication       |                   | X            |
| RFC1     |               | NER         | Replication       |                   |              |
| RFC5     |               | NER         | Replication       |                   |              |
| RPA1     | DSB HR        | NER BER MMR | Replication       |                   | X            |
| RPL26    |               |             |                   | Others            |              |
| RSL1D1   |               |             |                   | Others            |              |
| RUVBL1   |               |             |                   | Others            |              |
| RUVBL2   |               |             |                   | Others            |              |
| SMCHD1   | DSB           |             |                   |                   |              |
| TNKS1BP1 | DSB           |             |                   |                   |              |
| TRIP13   | DSB           |             |                   |                   | X            |
| XRCC5    | DSB           | NHEJ        |                   |                   | X            |
| XRCC6    | DSB           | NHEJ        |                   |                   | X            |
| YWHAG    | DSB           |             | Cell cycle        |                   | X            |
